# Supplementary material
Source: Springer Nature journal article supplement (https://www.springermedizin.de/resource/supplementary/12963_2013_238_MOESM1_ESM.pdf/9572426)

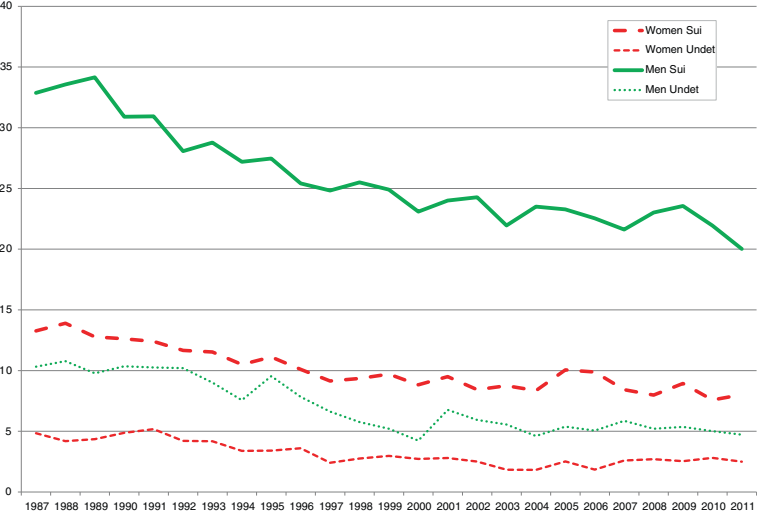

Supplement: MOESM1 [file 9572426]
